# Supplementary material for: Long-term investigation of pollutant removal efficiency in two constructed wetlands for wastewater treatment and reuse in urban areas
Source: Frontiers journal article supplement (doi:10.3389/fenvs.2025.1606056), 2025-07-11
Supplement: Data_Sheet_1.docx [file Data_Sheet_1.docx]

Supplementary Material

# Supplementary Tables

**Table S1.** Monthly weather data for the five years at ExpF_1 (Raffadali).

| **Dates** | **T min**  **[°C]** | | **T max**  **[°C]** | | **Rainfall**  **[mm]** | | **UR min**  **[%]** | | **UR max**  **[%]** | | **Leaf wetness**  **[min]** | | **ET0**  **[mm]** | |
| --- | --- | --- | --- | --- | --- | --- | --- | --- | --- | --- | --- | --- | --- | --- |
| January-2014 | 7.13 | 14.56 | | 122.20 | | 62.13 | | 93.94 | | 731.32 | | 33.04 | |
| February-2014 | 7.01 | 16.07 | | 57.40 | | 54.36 | | 92.29 | | 537.93 | | 44.40 | |
| March-2014 | 7.03 | 16.54 | | 117.40 | | 50.32 | | 90.71 | | 534.81 | | 68.89 | |
| April-2014 | 9.30 | 19.97 | | 49.40 | | 46.43 | | 92.13 | | 568.17 | | 95.32 | |
| May-2014 | 11.92 | 23.45 | | 12.80 | | 40.19 | | 88.10 | | 325.61 | | 131.55 | |
| June-2014 | 16.47 | 29.74 | | 7.00 | | 27.00 | | 79.97 | | 150.47 | | 162.26 | |
| July-2014 | 18.73 | 30.66 | | 0.00 | | 31.16 | | 80.03 | | 148.00 | | 176.72 | |
| August-2014 | 20.26 | 32.73 | | 0.00 | | 28.29 | | 82.39 | | 286.77 | | 171.42 | |
| September-2014 | 19.16 | 29.18 | | 4.20 | | 41.27 | | 83.90 | | 735.37 | | 119.33 | |
| October-2014 | 15.25 | 25.15 | | 35.60 | | 46.58 | | 92.45 | | 772.19 | | 75.53 | |
| November-2014 | 12.99 | 20.82 | | 98.20 | | 61.57 | | 94.80 | | 678.50 | | 40.83 | |
| December-2014 | 7.96 | 15.37 | | 69.40 | | 58.29 | | 92.39 | | 402.00 | | 32.01 | |
| January -2015 | 5.69 | 14.25 | | 101.00 | | 55.74 | | 93.71 | | 909.32 | | 34.50 | |
| February-2015 | 5.48 | 12.15 | | 196.00 | | 60.00 | | 93.93 | | 864.89 | | 36.31 | |
| March-2015 | 5.33 | 13.80 | | 62.80 | | 54.55 | | 92.61 | | 437.13 | | 60.63 | |
| April-2015 | 5.81 | 16.71 | | 2.60 | | 39.67 | | 90.60 | | 326.47 | | 94.56 | |
| May-2015 | 13.11 | 26.04 | | 8.20 | | 30.06 | | 82.39 | | 207.06 | | 145.02 | |
| June-2015 | 17.19 | 29.55 | | 19.20 | | 28.63 | | 83.10 | | 150.40 | | 164.86 | |
| July-2015 | 22.03 | 34.30 | | 0.00 | | 24.81 | | 78.10 | | 114.13 | | 196.24 | |
| August-2015 | 21.35 | 32.65 | | 16.80 | | 31.03 | | 86.71 | | 248.61 | | 160.03 | |
| September-2015 | 18.24 | 28.98 | | 35.40 | | 37.70 | | 89.80 | | 335.50 | | 114.77 | |
| October-2015 | 15.39 | 24.07 | | 92.00 | | 55.32 | | 94.65 | | 535.94 | | 69.80 | |
| November-2015 | 11.77 | 19.63 | | 39.40 | | 55.03 | | 93.23 | | 414.30 | | 45.16 | |
| December-2015 | 7.15 | 16.52 | | 1.20 | | 57.03 | | 95.52 | | 671.06 | | 28.74 | |
| January -2016 | 6.93 | 14.86 | | 46.80 | | 56.61 | | 94.48 | | 886.00 | | 35.31 | |
| February-2016 | 8.21 | 16.64 | | 36.20 | | 57.38 | | 96.69 | | 777.25 | | 44.96 | |
| March-2016 | 6.80 | 16.55 | | 84.20 | | 51.84 | | 94.94 | | 836.61 | | 67.69 | |
| April-2016 | 11.14 | 23.04 | | 28.60 | | 32.67 | | 83.03 | | 275.67 | | 114.50 | |
| May-2016 | 13.13 | 24.42 | | 28.20 | | 33.42 | | 82.26 | | 326.19 | | 137.82 | |
| June-2016 | 17.76 | 30.01 | | 14.80 | | 30.07 | | 78.90 | | 142.30 | | 169.93 | |
| July-2016 | 20.28 | 33.05 | | 1.40 | | 22.45 | | 71.06 | | 58.81 | | 204.25 | |
| August-2016 | 20.16 | 31.42 | | 13.60 | | 31.29 | | 80.39 | | 235.39 | | 170.81 | |
| September-2016 | 17.99 | 27.88 | | 31.40 | | 40.53 | | 87.13 | | 317.07 | | 114.40 | |
| October-2016 | 16.51 | 25.03 | | 53.80 | | 49.84 | | 92.81 | | 498.97 | | 78.43 | |
| November-2016 | 12.10 | 18.87 | | 105.20 | | 60.17 | | 92.77 | | 973.63 | | 40.61 | |
| December-2016 | 8.45 | 15.52 | | 29.40 | | 58.83 | | 87.12 | | 794.61 | | 37.11 | |
| January -2017 | 4.22 | 12.07 | | 193.40 | | 54.30 | | -- | | 794.35 | | 34.42 | |
| February-2017 | 7.38 | 15.59 | | 129.20 | | 58.11 | | 90.89 | | 453.61 | | 41.59 | |
| March-2017 | 7.38 | 18.51 | | 5.00 | | 38.45 | | 87.35 | | 466.29 | | 86.78 | |
| April-2017 | 8.97 | 20.42 | | 38.60 | | 37.23 | | 88.87 | | 409.83 | | 104.68 | |
| May-2017 | 13.63 | 26.26 | | 0.60 | | 29.35 | | 83.19 | | 170.32 | | 150.62 | |
| June-2017 | 18.05 | 31.53 | | 3.60 | | 26.13 | | 78.90 | | 143.90 | | 176.00 | |
| July-2017 | 20.44 | 33.25 | | 14.20 | | 20.97 | | 68.16 | | 51.58 | | 197.88 | |
| August-2017 | 22.78 | 35.02 | | 0.00 | | 20.97 | | 62.35 | | 71.87 | | 192.05 | |
| September-2017 | 16.83 | 27.26 | | 33.80 | | 38.80 | | 82.47 | | 411.13 | | 114.68 | |
| October-2017 | 14.06 | 23.58 | | 12.60 | | 42.16 | | 84.97 | | 420.81 | | 83.96 | |
| November-2017 | 10.15 | 18.06 | | 52.80 | | 54.23 | | 89.43 | | 980.63 | | 41.18 | |
| December-2017 | 5.73 | 14.05 | | 12.40 | | 48.52 | | 86.29 | | 861.58 | | 37.04 | |
| January -2018 | 7.92 | 15.32 | | 34.00 | | 54.39 | | 88.77 | | 860.00 | | 39.84 | |
| February-2018 | 6.12 | 13.23 | | 150.20 | | 55.00 | | 89.36 | | 910.86 | | 40.37 | |
| March-2018 | 8.58 | 16.96 | | 55.80 | | 50.35 | | 89.26 | | 710.65 | | 69.84 | |
| April-2018 | 11.12 | 22.44 | | 13.40 | | 38.53 | | 79.70 | | 322.40 | | 110.37 | |
| May-2018 | 13.67 | 25.49 | | 24.60 | | 36.55 | | 84.42 | | 377.19 | | 137.56 | |
| June-2018 | 17.44 | 29.31 | | 46.60 | | 31.53 | | 82.50 | | 347.00 | | 159.70 | |
| July-2018 | 20.49 | 33.99 | | 0.60 | | 23.55 | | 76.23 | | 87.84 | | 199.13 | |
| August-2018 | 20.74 | 31.44 | | 17.60 | | 34.87 | | 82.00 | | 127.00 | | 154.21 | |
| September-2018 | 19.18 | 28.79 | | 40.60 | | 42.10 | | 85.50 | | 283.83 | | 114.69 | |
| October-2018 | 15.27 | 22.85 | | 136.60 | | 58.00 | | 92.39 | | 734.61 | | 63.90 | |
| November-2018 | 11.65 | 19.13 | | 150.60 | | 61.37 | | 91.57 | | 419.80 | | 39.38 | |
| December-2018 | 6.87 | 15.25 | | 19.40 | | 57.94 | | 91.48 | | 711.00 | | 33.27 | |

**Table S2.** Monthly weather data for the five years at ExpF_2 (Piana degli Albanesi).

| **Dates** | **T min [°C]** | **T max [°C]** | **Rainfall [mm]** | **UR min [%]** | **UR max [%]** | **Leaf wetness [min]** | **ET0 [mm]** |
| --- | --- | --- | --- | --- | --- | --- | --- |
| January-2014 | 5.66 | 12.25 | 220.80 | 73.52 | 100.00 | 524.48 | 29.18 |
| February-2014 | 6.29 | 13.46 | 136.60 | -- | -- | 513.50 | 55.69 |
| March-2014 | 5.03 | 13.30 | 225.60 | 48.68 | 85.68 | 476.35 | 66.93 |
| April-2014 | 7.90 | 16.76 | 155.60 | 44.17 | 83.10 | 324.23 | 94.14 |
| May-2014 | 9.61 | 19.96 | 31.80 | 42.16 | 84.45 | 581.55 | 118.40 |
| June-2014 | 14.04 | 25.65 | 2.60 | 32.90 | 79.43 | 235.53 | 157.27 |
| July-2014 | 15.85 | 27.46 | 5.20 | 33.35 | 78.97 | 345.87 | 164.67 |
| August-2014 | 16.67 | 29.98 | 0.00 | 28.84 | 81.29 | 413.03 | 156.97 |
| September-2014 | 16.23 | 26.76 | 25.60 | 37.17 | 82.70 | 687.43 | 113.90 |
| October-2014 | 13.16 | 23.02 | 81.80 | 38.03 | 82.23 | 325.64 | 82.75 |
| November-2014 | 10.77 | 18.68 | 64.20 | 45.47 | 83.33 | -- | 60.62 |
| December-2014 | 5.93 | 12.43 | 161.60 | 56.42 | 85.06 | 96.19 | 35.94 |
| January -2015 | 4.59 | 12.00 | 230.80 | 49.58 | 84.68 | 117.68 | 40.45 |
| February-2015 | 3.82 | 10.11 | 326.20 | 58.68 | 86.86 | 238.57 | 37.36 |
| March-2015 | 5.72 | 13.74 | 159.20 | 51.60 | 86.97 | 104.60 | 63.35 |
| April-2015 | 6.99 | 17.87 | 13.40 | 38.30 | 81.27 | 21.17 | 108.50 |
| May-2015 | 11.92 | 23.17 | 74.00 | 33.29 | 77.97 | 49.29 | 149.01 |
| June-2015 | 14.22 | 26.47 | 3.60 | 33.47 | 84.43 | 13.73 | 156.65 |
| July-2015 | 18.29 | 31.26 | 5.00 | 30.58 | 82.39 | 27.90 | 179.13 |
| August-2015 | 18.03 | 29.59 | 44.80 | 37.16 | 85.81 | 53.16 | 151.00 |
| September-2015 | 16.80 | 26.82 | 64.60 | 38.47 | 82.20 | 37.77 | 122.58 |
| October-2015 | 13.35 | 21.65 | 178.40 | 51.16 | 89.06 | 11.26 | 79.14 |
| November-2015 | 8.55 | 17.24 | 267.80 | 55.37 | 93.73 | 42.93 | 41.07 |
| December-2015 | 5.08 | 15.55 | 13.80 | 47.06 | 89.94 | 248.84 | 35.87 |
| January -2016 | 5.20 | 12.29 | 101.80 | 52.13 | 89.13 | 159.29 | 45.13 |
| February-2016 | 6.66 | 14.51 | 76.60 | 45.93 | 87.52 | 137.14 | 59.86 |
| March-2016 | 6.29 | 13.59 | 197.80 | 48.00 | 83.74 | 137.97 | 78.56 |
| April-2016 | 9.49 | 20.88 | 22.00 | 29.83 | 77.10 | 149.90 | 125.68 |
| May-2016 | 10.24 | 21.30 | 80.40 | 35.55 | 83.45 | 78.68 | 134.06 |
| June-2016 | 13.93 | 26.04 | 30.80 | 34.00 | 85.87 | 95.97 | 151.46 |
| July-2016 | 16.76 | 29.93 | 6.00 | 29.87 | 79.00 | 258.81 | 172.99 |
| August-2016 | 15.99 | 29.36 | 17.40 | 29.97 | 85.00 | 382.00 | 150.60 |
| September-2016 | 14.42 | 25.33 | 54.80 | 41.03 | 92.07 | 734.43 | 95.72 |
| October-2016 | 12.82 | 23.38 | 142.20 | 40.32 | 91.39 | 177.55 | 85.50 |
| November-2016 | 9.29 | 17.30 | 86.80 | 48.07 | 88.93 | 173.73 | 51.83 |
| December-2016 | 5.23 | 14.02 | 11.00 | 49.03 | 90.00 | 384.10 | 34.90 |
| January -2017 | 1.86 | 8.70 | 314.80 | 55.77 | 93.19 | 384.81 | 33.49 |
| February-2017 | 5.21 | 13.52 | 135.20 | 55.46 | 97.00 | 46.25 | 46.03 |
| March-2017 | 5.36 | 16.35 | 20.00 | 35.10 | 97.48 | 591.00 | 81.20 |
| April-2017 | 6.93 | 17.91 | 89.00 | 37.07 | 93.87 | 330.00 | 104.01 |
| May-2017 | 10.90 | 23.20 | 0.00 | 31.52 | 96.58 | 206.03 | 144.18 |
| June-2017 | 15.80 | 28.71 | 3.40 | 27.60 | 91.40 | 146.80 | 170.47 |
| July-2017 | 18.00 | 30.57 | 5.60 | 24.48 | 80.29 | 128.26 | 184.83 |
| August-2017 | 19.45 | 32.89 | 0.00 | 20.10 | 74.32 | 218.94 | 174.58 |
| September-2017 | 14.39 | 25.26 | 72.00 | 36.07 | 96.40 | 599.37 | 112.03 |
| October-2017 | 11.34 | 20.98 | 40.60 | 44.81 | 99.13 | 518.77 | 69.18 |
| November-2017 | 7.85 | 15.43 | 140.00 | 60.57 | 100.00 | 593.37 | 37.75 |
| December-2017 | 4.17 | 10.91 | 143.60 | 53.26 | 100.00 | 675.23 | 35.12 |
| January -2018 | 6.02 | 12.73 | 75.00 | 56.97 | 96.32 | 894.77 | 42.86 |
| February-2018 | 3.39 | 10.08 | 413.20 | 68.82 | 100.00 | 268.61 | 30.47 |
| March-2018 | 7.17 | 14.10 | 187.20 | 50.90 | 97.32 | 182.39 | 72.19 |
| April-2018 | 8.73 | 20.33 | 29.00 | 32.80 | 97.90 | 300.70 | 102.08 |
| May-2018 | 10.39 | 21.22 | 76.40 | 60.32 | 100.00 | 281.65 | 106.72 |
| June-2018 | 13.98 | 25.31 | 57.80 | 48.33 | 100.00 | 130.97 | 132.21 |
| July-2018 | 17.08 | 30.80 | 0.00 | 28.45 | 96.06 | 57.19 | 181.90 |
| August-2018 | 17.03 | 28.37 | 102.40 | 49.16 | 100.00 | 258.03 | 116.87 |
| September-2018 | 15.53 | 26.77 | 71.00 | 46.80 | 100.00 | 266.63 | 96.96 |
| October-2018 | 12.18 | 21.31 | 182.40 | 63.52 | 100.00 | 167.48 | 61.30 |
| November-2018 | 9.26 | 16.87 | 295.00 | 65.53 | 100.00 | 120.67 | 38.74 |
| December-2018 | 5.70 | 12.96 | 88.00 | 69.84 | 100.00 | 579.58 | 26.10 |
